# Supplementary material
Source: HighWire-hosted journal article supplement (https://msphere.asm.org/content/3/6/e00525-18)

**A**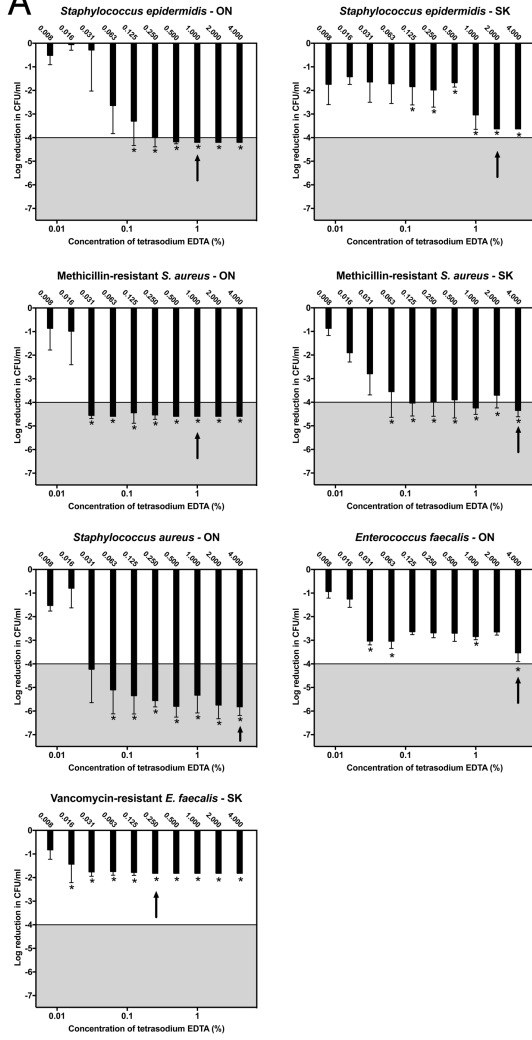**B**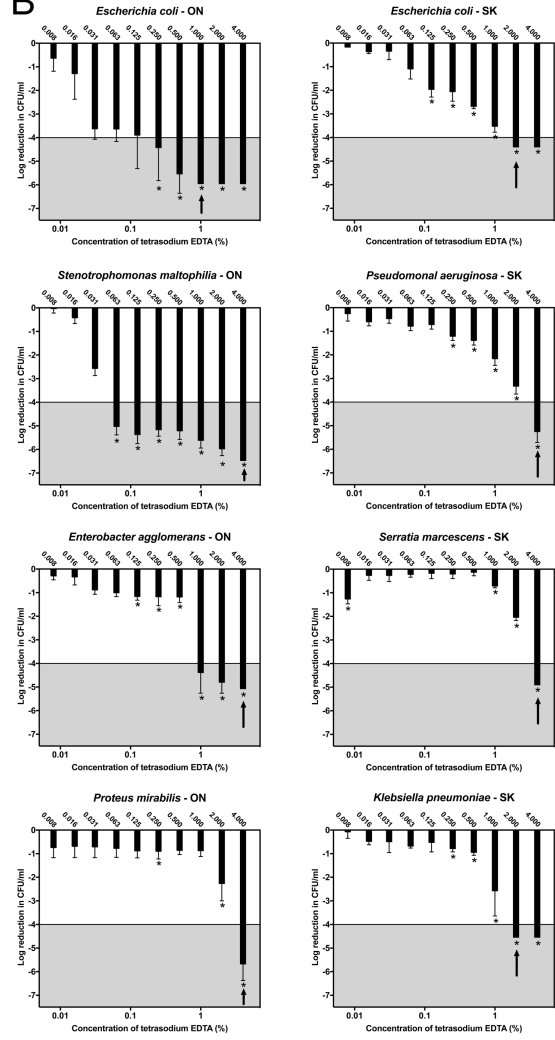

**C**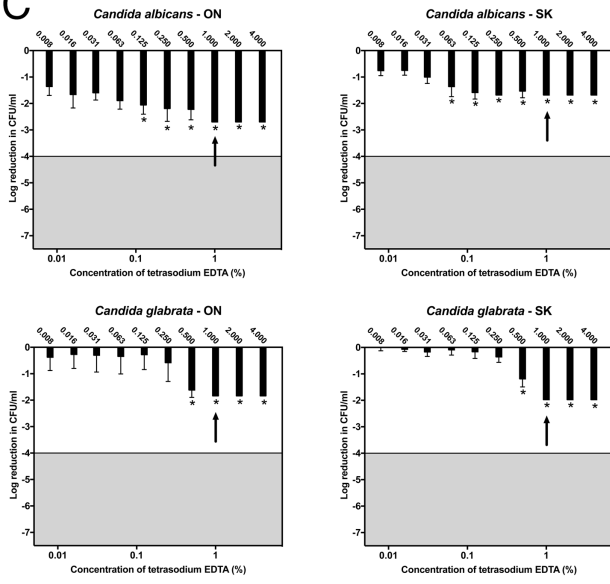**D**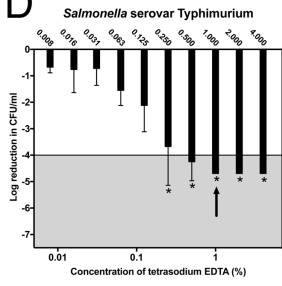

Supplement: inline-supplementary-material-3 [file inline-supplementary-material-3.pdf]
